# Supplementary material
Source: PubMed Central journal article supplement (PMC2817322)
Supplement: 090268_2.pdf [file 090268_2.pdf]

**Appendix 2 (as supplied by the authors): Variables collected as part of the Tanzanian National Voucher Scheme 2007 household survey for analysis of the voucher scheme process and use of insecticide treated nets by currently pregnant women.**

The 2007 Tanzanian National Voucher Scheme Household Survey was implemented in Swahili and data entered by interviewers at point of interview using hand held personal digital assistants (PDA). The series of questions extracted from the programmed household survey instrument to measure coverage at each of the steps in the voucher process are shown below in English.

**1. ANALYSIS OF PROCESS**

Data derived from the women’s module of the household survey

**STEP 1: Attendance to antenatal clinic**

*The proportion of all women who had a live birth during the previous 12 months who attended antenatal clinic.*

**STEP 2: Received a net voucher**

*The proportion of all women who had a live birth during the previous 12 months who attended antenatal clinic and received a voucher.*

**STEP 3: Used a voucher to buy a net**

*The proportion of all women who had a live birth during the previous 12 months, attended clinic and received a voucher, and who used the voucher to buy a net.*

**STEP 4: Net bought bundled with insecticide**

*The proportion of all women who had a live birth during the previous 12 months who attended antenatal clinic, received a voucher, used the voucher, and obtained a net which had been bundled with an insecticide treatment kit.*

Controlling questions in women’s module to identify women with a past pregnancy:

*I would like to write down all the names of the children that you gave birth to in 2006 and 2007, even if they died.*

**(Start with the youngest one. For twins, write every child in a separate line. If a child was not given a name, write “not given” in the name of the child).**

| Name                       | Twins?<br>1 = Lone<br>2 = Twins | Sex<br>1=M<br>2=F             | When was s/he born?<br>(day/month/year)                                    | Is s/he still<br>alive?<br>1=Yes<br>2 = No | If the child died, when did s/he die??                                          |
|----------------------------|---------------------------------|-------------------------------|----------------------------------------------------------------------------|--------------------------------------------|---------------------------------------------------------------------------------|
| <input type="text"/> name1 | <input type="checkbox"/> twin1  | <input type="checkbox"/> sex1 | <input type="text"/> / <input type="text"/> / <input type="text"/><br>dob1 | <input type="checkbox"/> alive1            | <input type="text"/> / <input type="text"/> / <input type="text"/><br>whendied1 |
| <input type="text"/> name2 | <input type="checkbox"/> twin2  | <input type="checkbox"/> sex2 | <input type="text"/> / <input type="text"/> / <input type="text"/><br>dob2 | <input type="checkbox"/> alive2            | <input type="text"/> / <input type="text"/> / <input type="text"/><br>whendied2 |
| <input type="text"/> name3 | <input type="checkbox"/> twin3  | <input type="checkbox"/> sex3 | <input type="text"/> / <input type="text"/> / <input type="text"/><br>dob3 | <input type="checkbox"/> alive3            | <input type="text"/> / <input type="text"/> / <input type="text"/><br>whendied3 |

Variables extracted from the women’s module are shown below. The PDA was programmed to load a number of ‘past pregnancy forms’ to correspond to the number of babies the woman reported in the preceding 12 months (above). Note, at the data collection stage calendar years 2006 and 2007 were used in order to minimise interviewer error. Dates of birth were restricted to those that had occurred during the 12 months prior to survey at the analysis stage. The example here shows a possible 3 births reported, although after restriction of dates during analysis no respondents contributed more than one live birth.

|                                                                                                                                                                                          |                                        |                                        |                                        |
|------------------------------------------------------------------------------------------------------------------------------------------------------------------------------------------|----------------------------------------|----------------------------------------|----------------------------------------|
| While you were pregnant with NAME, did you attend an antenatal care clinic?<br>1=Yes 2=No ( <b>Skip to xx</b> )                                                                          | <input type="checkbox"/><br>attendRCH1 | <input type="checkbox"/><br>attendRCH2 | <input type="checkbox"/><br>attendRCH3 |
| Did an RCH worker give you a discount voucher for pregnant women for buying a mosquito net?<br>( <b>Interviewer: show copy of Hati Punguzo</b> )<br>1 = Yes 2 = No ( <b>Skip to xx</b> ) | <input type="checkbox"/><br>recdvouch1 | <input type="checkbox"/><br>recdvouch2 | <input type="checkbox"/><br>recdvouch3 |
| Did you use the voucher to buy a net?<br>1=Yes 2=No ( <b>Skip to xx</b> )                                                                                                                | <input type="checkbox"/><br>usevouch1  | <input type="checkbox"/><br>usevouch2  | <input type="checkbox"/><br>usevouch3  |
| Did the net come packaged together with insecticide?<br>1=Yes<br>2=No<br>9=Don't know                                                                                                    | <input type="checkbox"/><br>Bundled1   | <input type="checkbox"/><br>Bundled 2  | <input type="checkbox"/><br>Bundled3   |

Data derived from the household and net module of the household survey

### STEP 5 Voucher nets treated with insecticide

The proportion of nets purchased with a voucher which had been effectively treated with insecticide (i.e. within the 12 months prior to survey)

Controlling question in household module:

|                                                                                                                       |                                 |
|-----------------------------------------------------------------------------------------------------------------------|---------------------------------|
| How many mosquito nets does your household have?<br><b>If 1 or more go to nets module. If "0" Skip to question xx</b> | <input type="text"/><br>numnets |
|-----------------------------------------------------------------------------------------------------------------------|---------------------------------|

Variable extracted from nets module. The PDA was programmed to load a number of 'net module forms' to correspond to the number of nets in the household (above). The example here shows for 3 nets. Analysis was restricted to voucher nets only.

|                                                                                                                                                 | Net # 1                                | Net # 2                                | Net # 3                                |
|-------------------------------------------------------------------------------------------------------------------------------------------------|----------------------------------------|----------------------------------------|----------------------------------------|
| Is the net observed?<br>1 =Yes 2 = No                                                                                                           | <input type="checkbox"/><br>seennet1   | <input type="checkbox"/><br>seennet2   | <input type="checkbox"/><br>seennet3   |
| What kind of net is it?<br>1=Ordinary net<br>2=Olyset net<br>3=Permanet<br>9=Don't know                                                         |                                        |                                        |                                        |
| How long ago did your household obtain the mosquito net? (Months ago)<br><b>If more than 3 years, indicate 96</b><br><b>Don't know write 99</b> | <input type="text"/><br>whenbought1    | <input type="text"/><br>whenbought2    | <input type="text"/><br>whenbought3    |
| Was the net purchased using: ( <b>select one option for each net</b> )<br>1. Voucher<br>2. Free net<br>3. Bought the net<br>4. Don't know       | <input type="checkbox"/><br>usedvouch1 | <input type="checkbox"/><br>usedvouch2 | <input type="checkbox"/><br>usedvouch3 |
| Has this net ever been treated with an insecticide?<br>1=Yes 2=No ( <b>Skip to x</b> )                                                          | <input type="checkbox"/><br>evertreat1 | <input type="checkbox"/><br>evertreat2 | <input type="checkbox"/><br>evertreat3 |
| What type of insecticide was used?<br>1=Brand name: Ngao<br>2=Brand name: Ngao ya Muda Mrefu<br>9=Don't know                                    |                                        |                                        |                                        |
| When was the last time the net was treated?<br>(month/year)<br>( <b>If don't know, write '07 2009'</b> )                                        | <input type="text"/><br>lasttreat1     | <input type="text"/><br>lasttreat2     | <input type="text"/><br>lasttreat3     |

2. USE OF INSECTICIDE TREATED NETS BY CURRENTLY PREGNANT WOMEN

Data derived from the women's module of the household survey

**OUTCOME: use of an insecticide treated net on the night before survey**

*The proportion of all currently pregnant women who slept under a mosquito net on the night preceding survey which had been treated with insecticide within the 12 month period prior to survey, or which had been treated with long lasting insecticide.*

Controlling questions in women's module to identify women with a past pregnancy:

|                                                                    |                                       |
|--------------------------------------------------------------------|---------------------------------------|
| Are you currently pregnant?<br>1=Yes<br>2=No ( <b>Skip to xx</b> ) | <input type="checkbox"/><br>currentpg |
|--------------------------------------------------------------------|---------------------------------------|

Variables extracted from the women's module for women currently pregnant are shown below.

|                                                                                                                                               |                                         |
|-----------------------------------------------------------------------------------------------------------------------------------------------|-----------------------------------------|
| Did you sleep under a mosquito net last night?<br>1=yes<br>2=No ( <b>Skip to xx</b> )                                                         | <input type="checkbox"/><br>sleptlast   |
| Have you ever treated this net with insecticide?<br>1 = Yes<br>2 = No ( <b>Skip to xx</b> )                                                   | <input type="checkbox"/><br>evertreat   |
| What type of insecticide was used?<br>1=Brand name: Ngao<br>2=Brand name: Ngao ya Muda Mrefu<br>8=Brand name: Other (specify)<br>9=Don't know | <input type="checkbox"/><br>insecticide |
| When was the last time you treated the net with insecticide (month/year)?<br>( <b>If don't know enter July 2009</b> )                         | _ _ / _ _ _ _ <br>lasttreat             |
