# Supplementary material
Source: PubMed Central journal article supplement (PMC2817322)
Supplement: 090268_3.pdf [file 090268_3.pdf]

**Appendix 3 (as supplied by the authors): Breakdown of quintiles for each socio-economic characteristic included in the principal components analysis of household socio-economic status of women with a past pregnancy.**

Supplementary table 2. Distribution of household characteristics included in the index of household socio-economic status, TNVS Household survey 2007

|                              |                                    | Household socio-economic status of women pregnant in previous 12 months <sup>1</sup> |                       |                       |                       |                                       |                     |
|------------------------------|------------------------------------|--------------------------------------------------------------------------------------|-----------------------|-----------------------|-----------------------|---------------------------------------|---------------------|
|                              |                                    | Quintile 1<br>(poorest)<br>[N=232]                                                   | Quintile 2<br>[N=328] | Quintile 3<br>[N=261] | Quintile 4<br>[N=274] | Quintile 5<br>(least poor)<br>[N=232] | Overall<br>[N=1327] |
| Household characteristic (%) | Toilet facility (flush or latrine) | 73                                                                                   | 84                    | 86                    | 91                    | 98                                    | 86                  |
|                              | Electricity supply                 | 0                                                                                    | 0                     | 0                     | 0                     | 44                                    | 8                   |
|                              | Iron/tile roof                     | 3                                                                                    | 7                     | 34                    | 71                    | 97                                    | 41                  |
|                              | Rented home                        | 6                                                                                    | 8                     | 5                     | 10                    | 21                                    | 10                  |
| Household head education (%) | None                               | 48                                                                                   | 38                    | 30                    | 24                    | 14                                    | 30                  |
|                              | Primary                            | 37                                                                                   | 34                    | 37                    | 36                    | 31                                    | 34                  |
|                              | Secondary                          | 15                                                                                   | 28                    | 33                    | 40                    | 55                                    | 35                  |
| Household ownership (%)      | Mobile phone                       | 0                                                                                    | 0                     | 4                     | 26                    | 92                                    | 22                  |
|                              | Bicycle                            | 25                                                                                   | 50                    | 56                    | 68                    | 66                                    | 53                  |
|                              | Radio                              | 8                                                                                    | 51                    | 73                    | 85                    | 90                                    | 62                  |
|                              | Goats/sheep/cows                   | 59                                                                                   | 45                    | 46                    | 43                    | 28                                    | 45                  |
|                              | Ducks/Chickens                     | 72                                                                                   | 77                    | 72                    | 64                    | 49                                    | 67                  |

<sup>1</sup> Quintile 1 represents the poorest households in the sample, rising to quintile 5 least poor.
